# Supplementary material for: Unveiling the antitumor potential of novel N-(substituted-phenyl)-8-methoxycoumarin-3-carboxamides as dual inhibitors of VEGFR2 kinase and cytochrome P450 for targeted treatment of hepatocellular carcinoma
Source: PubMed Central journal article supplement (PMC10436493; doi:10.3389/fchem.2023.1231030), 2023-08-04
Supplement: DataSheet1.pdf [file DataSheet1.pdf]

## Supplementary Materials

### **Unveiling the Antitumor Potential of Novel *N*-(Substituted-Phenyl)-8-Methoxycoumarin-3-Carboxamides as Dual Inhibitors of VEGFR2 Kinase and Cytochrome P450 for Targeted Treatment of Hepatocellular Carcinoma**

**Eman M. Radwan <sup>1</sup>, Eman Abo-Elabass <sup>2</sup>, Atef E. Abd El-Baky <sup>3</sup>, Hussah Abdullah Alshwyeh <sup>4,5</sup>, Riyadh A. Almaimani <sup>6</sup>, Ghassan Almaimani <sup>7</sup>, Ibrahim Abdel Aziz Ibrahim <sup>8</sup>, Abdulaziz Albogami <sup>9</sup>, Mariusz Jaremko <sup>10,\*</sup>, Samar Z. Alshawwa <sup>11</sup>, Essa M. Saied <sup>12,13,\*</sup>**

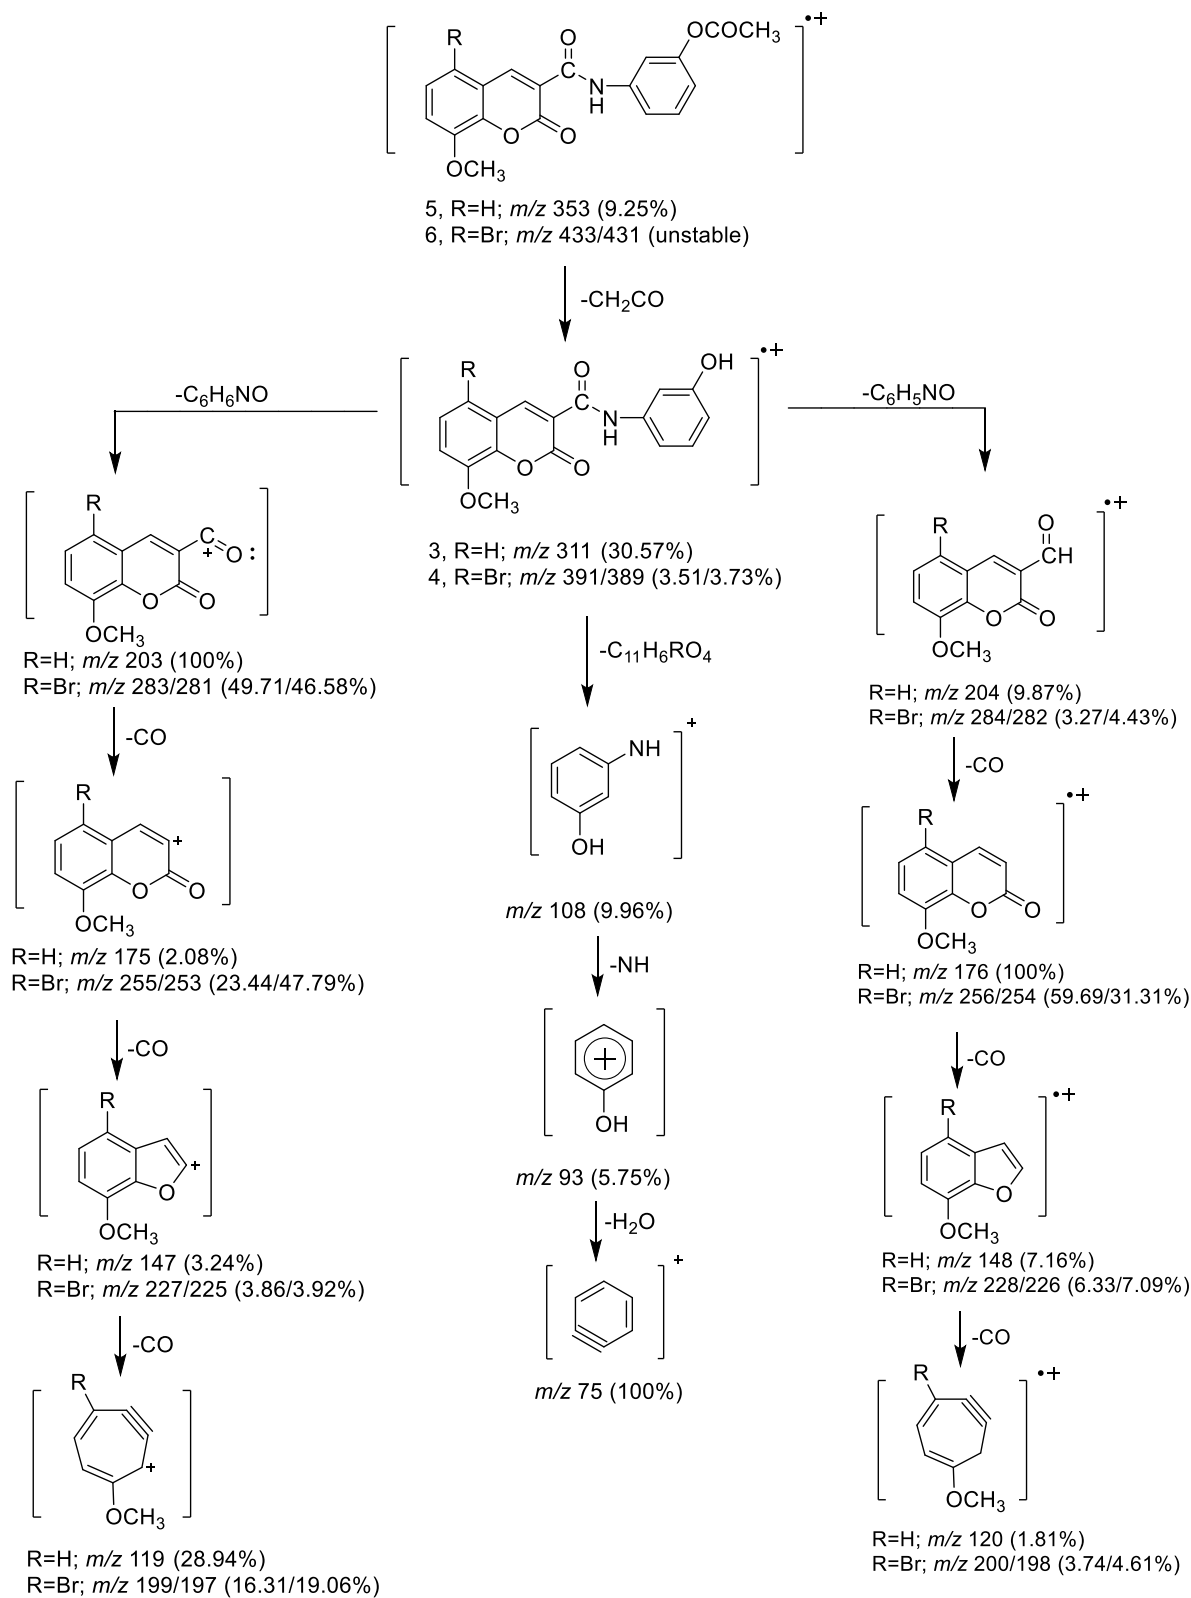

**Scheme S1.** The fragmentation pathways of compounds **3-6**.

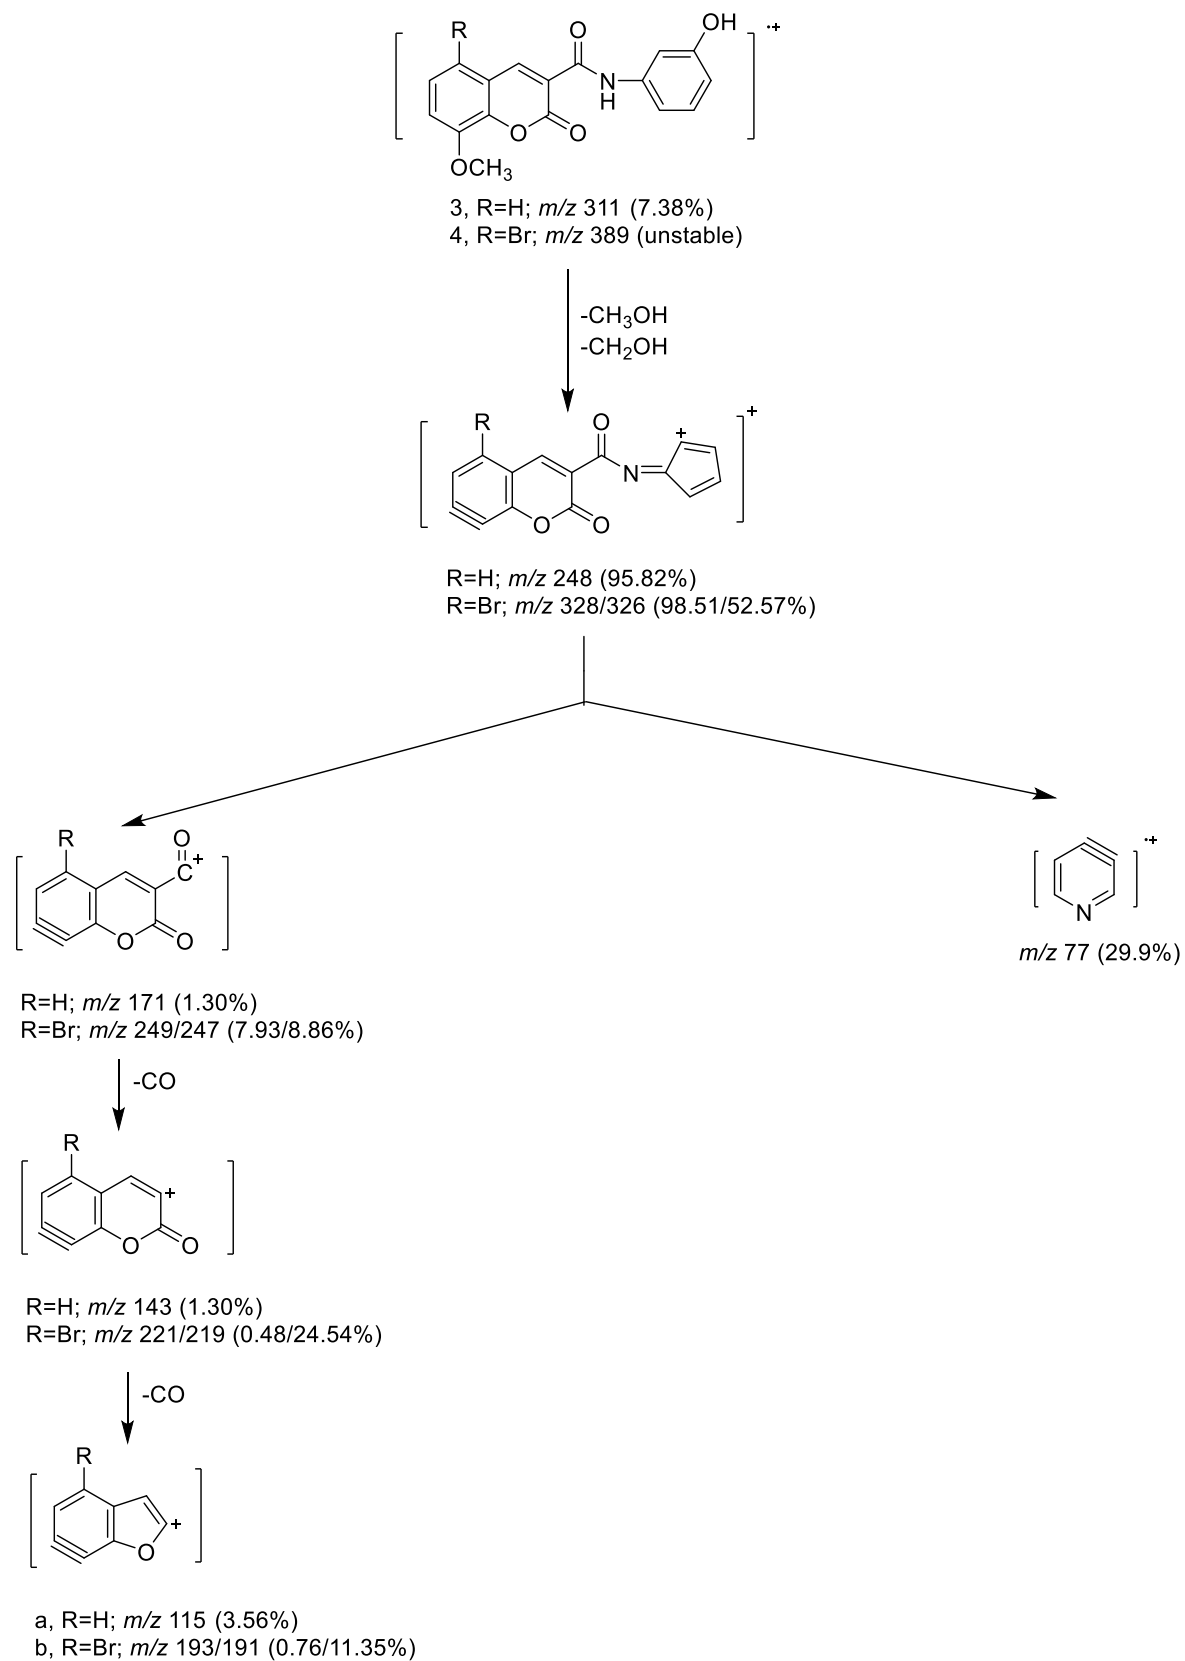

**Scheme S2.** The fragmentation pathways of compounds **3-4**.

Ibrahim Mohey - COI -110 - Hnmr - T

### COMP. 03

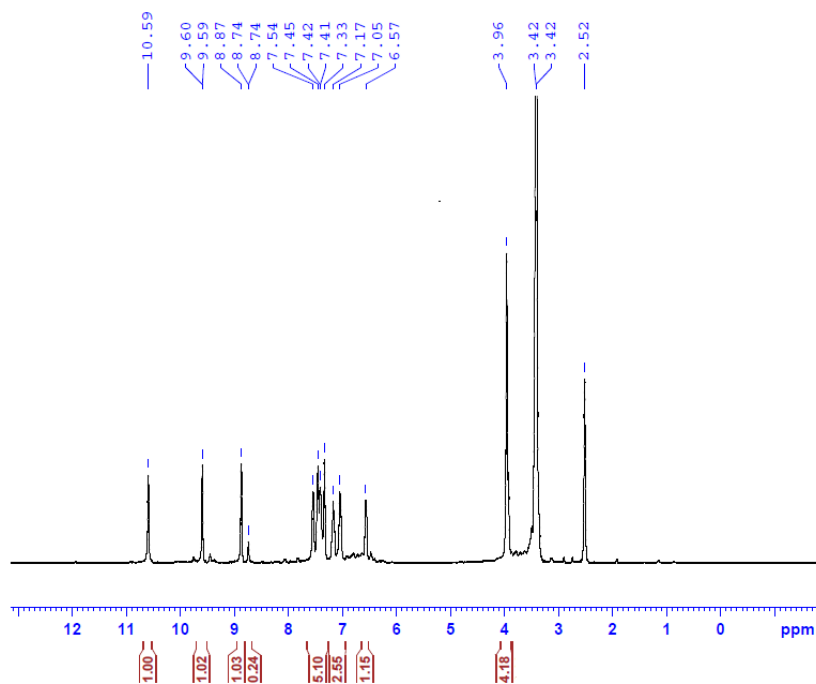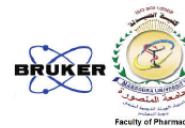

```
Current Data Parameters
NAME Ibrahim Mohey - COI -110 - Hnmr - T
EXPNO 1
PROCNO 1

F2 - Acquisition Parameters
Date_ 20220120
Time_ 11:48 h
INSTRUM spect
PROBHD 1H0618_0945 (1
PULPROG zgpg30
TD 65536
SOLVENT DMSO
NS 4
DS 4
SWH 8012.820 Hz
FIDRES 0.264023 Hz
AQ 4.089465 sec
RG 197.77
DM 20.800 usec
DE 6.50 usec
TE 294.2 K
D1 2.0000000 sec
D11 0.0300000 sec
TDO 1
SFO1 100.624712 MHz
NUC1 13C
P1 10.00 usec
PL1 0.0000000 W
SFO2 400.2024712 MHz
NUC2 1H
PC 1.00

F2 - Processing parameters
SI 32768
SF 100.6203700 MHz
WDW EM
SSB 0
LB 1.00 Hz
GB 0
PC 1.00
```

Ibrahim Mohey - COI-110 - Hnmr - T

### COMP 03

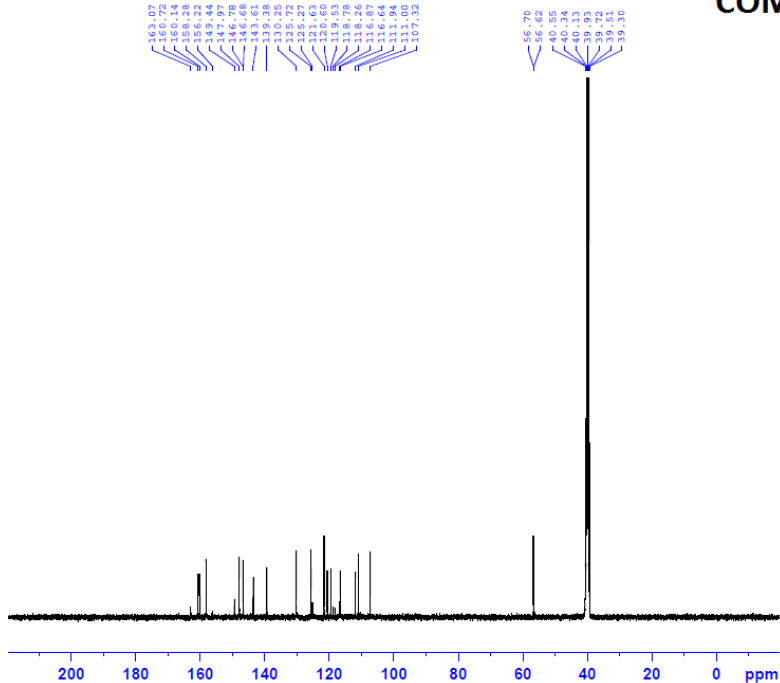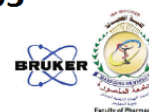

```
Current Data Parameters
NAME Ibrahim Mohey - COI-110 - Hnmr - T
EXPNO 1
PROCNO 1

F2 - Acquisition Parameters
Date_ 20220204
Time_ 19:24 h
INSTRUM spect
PROBHD 1H0618_0945 (1
PULPROG zgpg30
TD 65536
SOLVENT DMSO
NS 2200
DS 4
SWH 24038.461 Hz
FIDRES 0.733596 Hz
AQ 1.363148 sec
RG 197.77
DM 20.800 usec
DE 6.50 usec
TE 294.2 K
D1 2.0000000 sec
D11 0.0300000 sec
TDO 1
SFO1 100.624712 MHz
NUC1 13C
P1 10.00 usec
PL1 0.0000000 W
SFO2 400.201608 MHz
NUC2 1H
CPDPRG2 wait16
PCPD2 90.00 usec
PLM2 13.0000000 W
PLM12 0.29249999 W
PLM13 0.14713000 W

F2 - Processing parameters
SI 32768
SF 100.6203700 MHz
WDW EM
SSB 0
LB 1.00 Hz
GB 0
PC 1.40
```

Figure S1. <sup>1</sup>H NMR and <sup>13</sup>C NMR spectra of compound 3.

hamed-COI110 #574 RT: 1.98 AV: 1 NL: 1.07E5  
: (0,0) + c EI Full ms [50.00-500.00]

# COMP 03

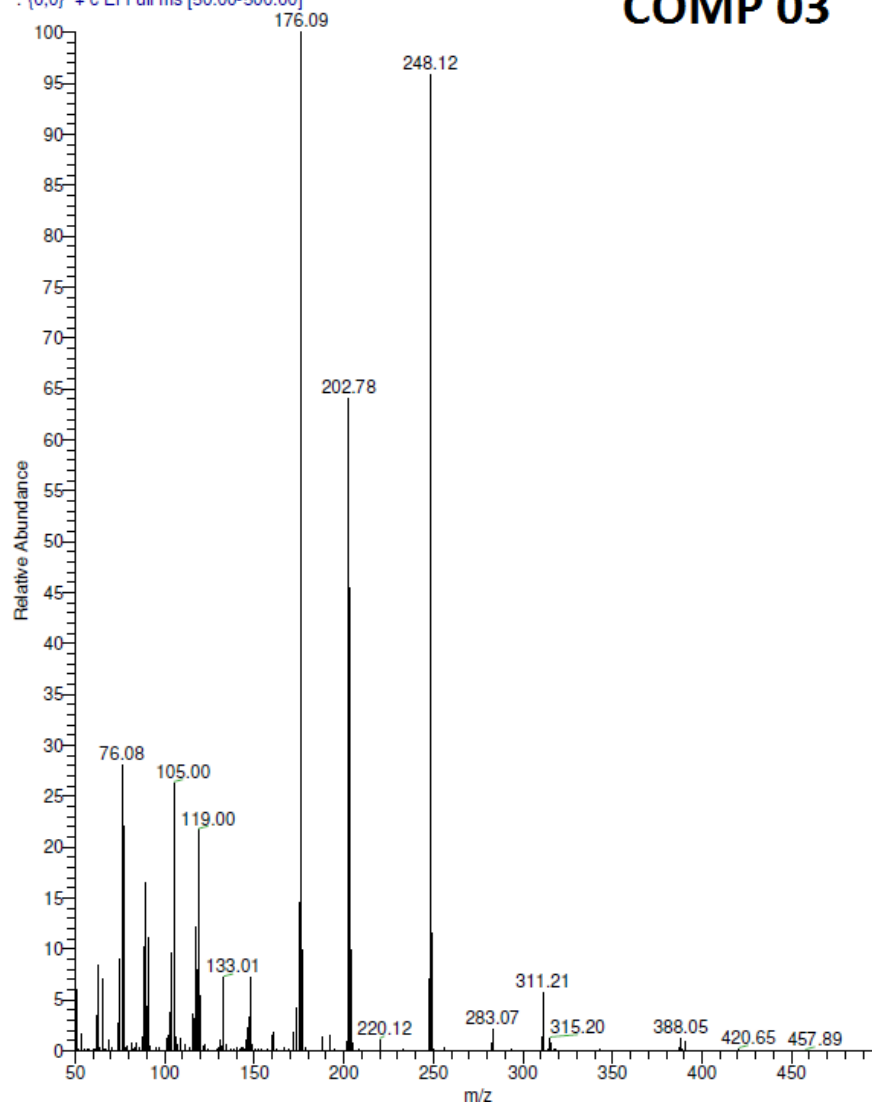

**Figure S1b.** Mass spectrum of compound 3.

hamed-COI112 #6 RT: 0.05 AV: 1 NL: 5.14E4  
Γ: {0,0} + c EI Full ms [50.00-500.00]

# COMP 04

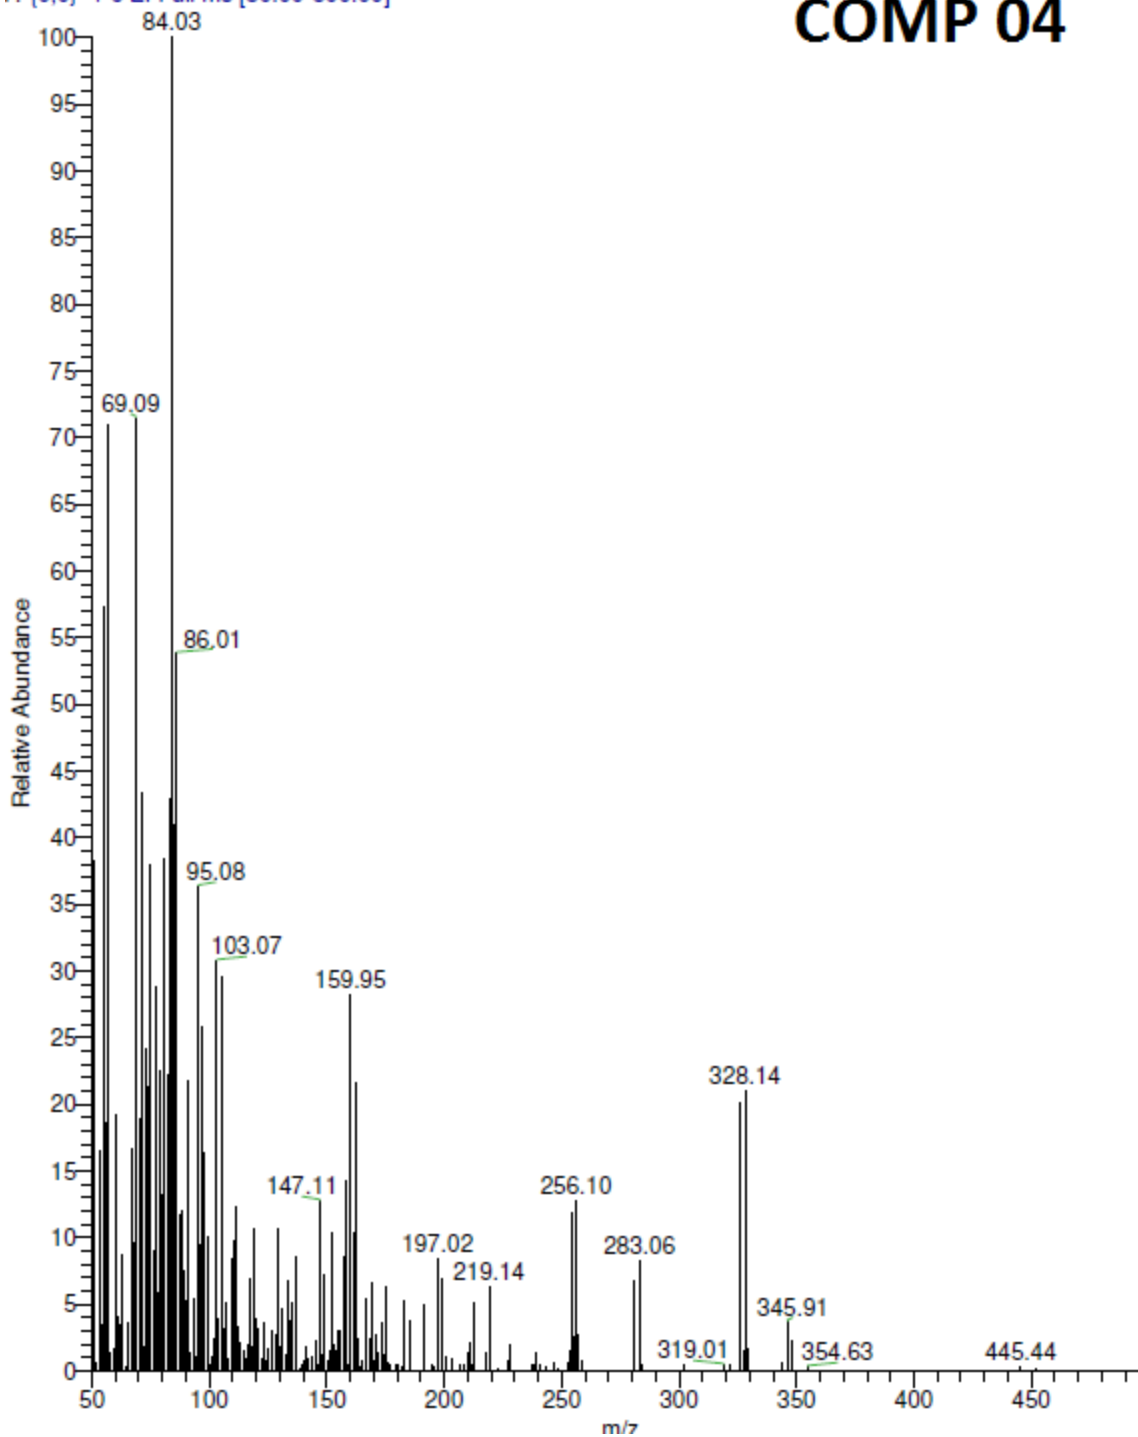

Figure S2. Mass spectrum of compound 4.

# COMP 05

Ibrahim Mohey - COI -111 - Hnmr - T

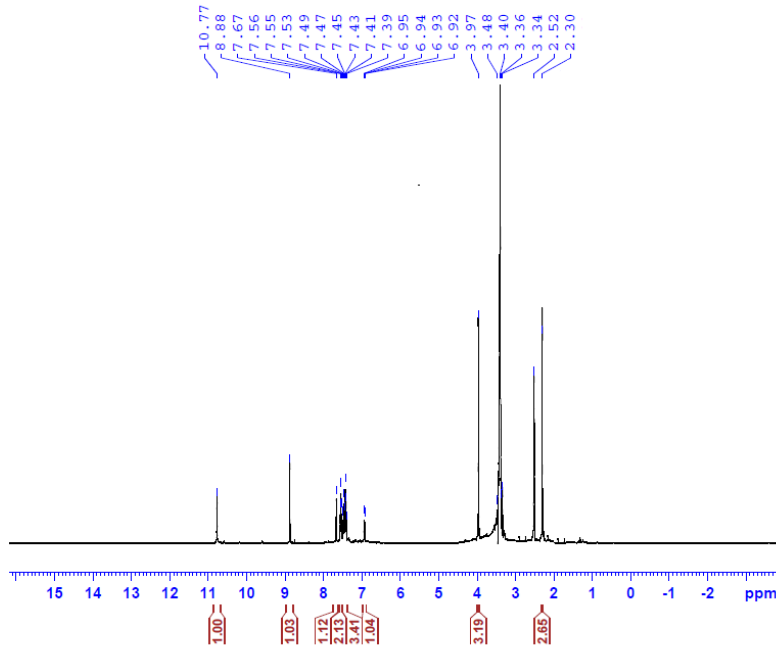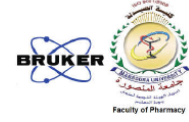

Current Data Parameters  
NAME Ibrahim Mohey - COI -111 - Hnmr - T  
EXPNO 1  
PROCNO 1  
F2 - Acquisition Parameters  
Date\_ 20220129  
Time 21:09 h  
INSTRUM spect  
PROBHD Z106618.0946 (1  
PULPROG zgpg30  
TD 65536  
SOLVENT DMSO  
NS 2  
DS 4  
SWH 8012.820 Hz  
FIDRES 0.266372 Hz  
AQ 4.092465 sec  
RG 320  
SFO 400.1460000 MHz  
DE 42.400 usec  
TE 293.2 K  
D1 1.00000000 sec  
TDS  
SFO1 400.2024112 MHz  
NUC1 13C  
P1 13.00000000 usec  
PL1 13.00000000 W  
F2 - Processing parameters  
SI 65536  
SF 400.2000000 MHz  
WDW EM  
SSB 0  
LB 0.35 Hz  
GB 0  
PC 1.00

# COMP 05

Ibrahim Mohey - COI-111 - Hnmr - T

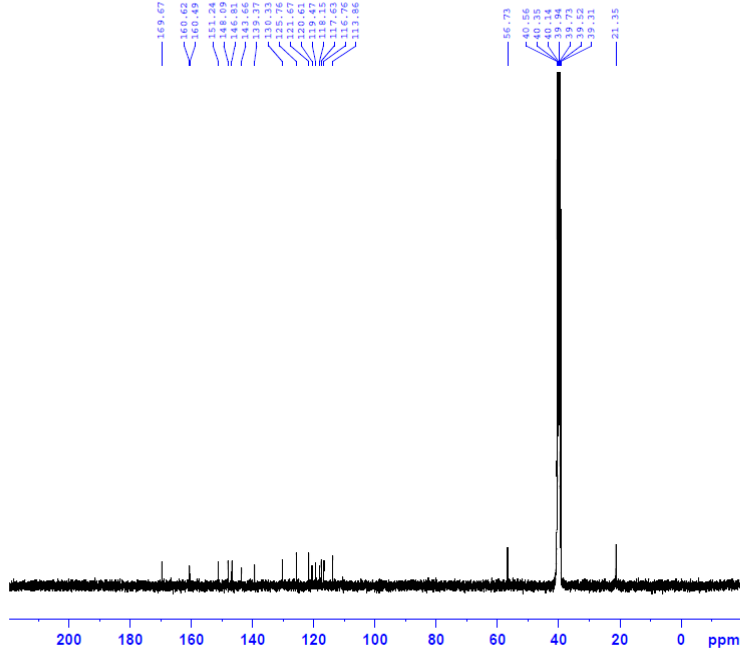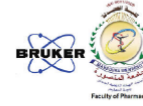

Current Data Parameters  
NAME Ibrahim Mohey - COI-111 - Hnmr - T  
EXPNO 10  
PROCNO 1  
F2 - Acquisition Parameters  
Date\_ 20220204  
Time 21:33 h  
INSTRUM spect  
PROBHD Z106618.0946 (1  
PULPROG zgpg30  
TD 65536  
SOLVENT DMSO  
NS 2200  
DS 4  
SWH 24038.461 Hz  
FIDRES 0.733596 Hz  
AQ 1.3631488 sec  
RG 197.77  
SFO 100.6261260 MHz  
DE 20.800 usec  
TE 294.7 K  
D1 2.00000000 sec  
D11 0.03000000 sec  
TDS  
SFO1 100.6404331 MHz  
NUC1 13C  
P1 10.00000000 usec  
PL1 47.00000000 W  
SFO2 400.2016008 MHz  
NUC2 1H  
CPDPRG12 waltz16  
PCPD2 80.00 usec  
PLM2 13.00000000 W  
PLM12 0.29249999 W  
PLM13 0.14713000 W  
F2 - Processing parameters  
SI 65536  
SF 100.6303700 MHz  
WDW EM  
SSB 0  
LB 1.00 Hz  
GB 0  
PC 1.40

Figure S3. <sup>1</sup>H NMR and <sup>13</sup>C NMR spectra of compound 5.

named-COI111 #912 RT: 3.13 AV: 1 NL: 9.40E4  
: (0,0) + c EI Full ms [50.00-500.00]

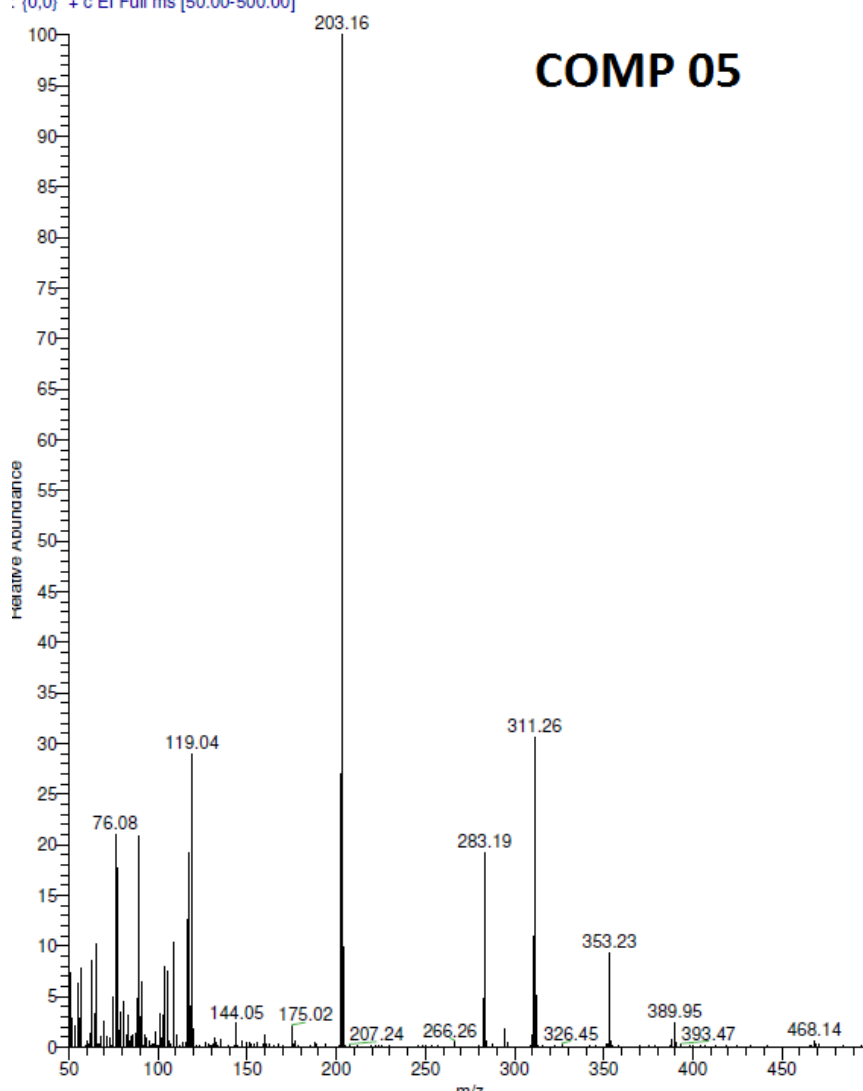

**Figure S3b.** Mass spectrum of compound **5**.



Ibrahim Mohey - COI-113 - Hnmr - T

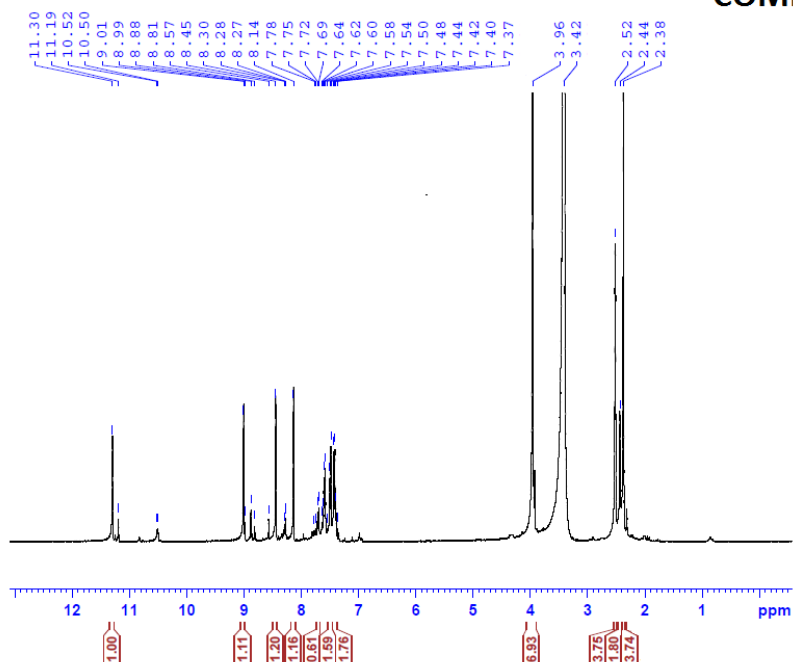

COMP 06

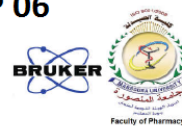

Current Data Parameters  
NAME Ibrahim Mohey - COI-113 - Hnmr - T  
EXPNO 1  
PROCNO 1

F2 - Acquisition Parameters  
Date\_ 20220229  
Time 11:58 h  
INSTRUM spect  
PROBHD 5108618\_098 (1  
PULPROG zgpg30  
TD 65536  
SOLVENT DMF0  
NS 15  
DS 4  
SWH 8011.800 Hz  
FIDRES 0.244532 Hz  
AQ 4.088465 sec  
RG 112.56  
RW 65.450 usec  
DE 6.50 usec  
TE 295.2 K  
D1 1.00000000 sec  
TDS 400.200470 MHz  
SFO1 13  
P1 13.00 usec  
PLM1 13.0000000 W

F2 - Processing parameters  
SI 65536  
SF 400.200000 MHz  
WDW EM  
SSB 0  
LB 0 0.30 Hz  
GB 0  
PC 1.00

Ibrahim Mohey - COI-113 - Hnmr - T

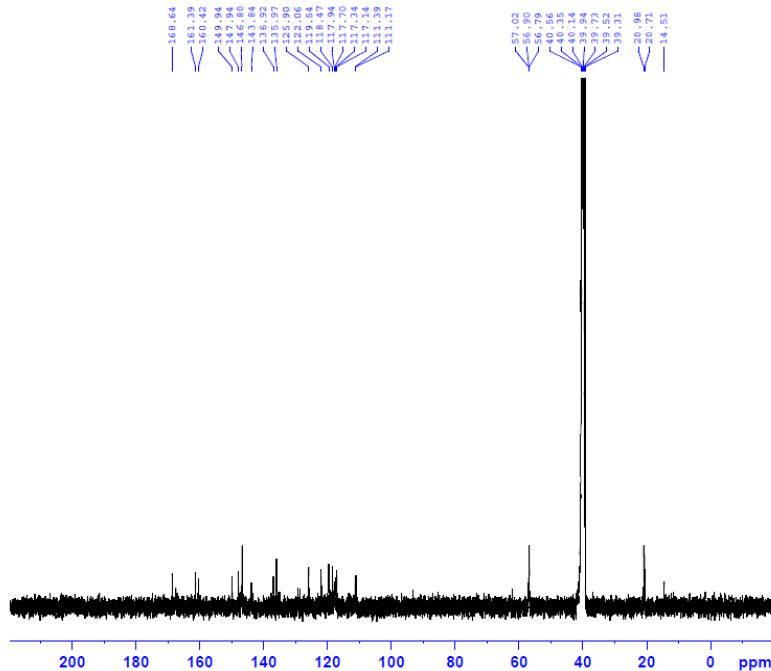

COMP 06

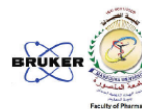

Current Data Parameters  
NAME Ibrahim Mohey - COI-113 - Hnmr - T  
EXPNO 1  
PROCNO 1

F2 - Acquisition Parameters  
Date\_ 20220204  
Time 23:43 h  
INSTRUM spect  
PROBHD 5108618\_0945 (1  
PULPROG zgpg30  
TD 65536  
SOLVENT DMF0  
NS 2200  
DS 4  
SWH 24038.461 Hz  
FIDRES 0.732596 Hz  
AQ 1.3631488 sec  
RG 197.77  
RW 20.800 usec  
DE 6.50 usec  
TE 295.2 K  
D1 2.00000000 sec  
D11 0.03000000 sec  
TDS 100.6404331 MHz  
SFO1 13  
P1 10.00 usec  
PLM1 47.0000000 W  
SFO2 400.2016008 MHz  
EPO2 1H  
MUC2 1H  
CPCPG2 waltz16  
PCPD2 90.00 usec  
PLM2 13.0000000 W  
PLM12 0.29249999 W  
PLM13 0.14713000 W

F2 - Processing parameters  
SI 32768  
SF 100.6303700 MHz  
WDW EM  
SSB 0  
LB 1.00 Hz  
GB 0  
PC 1.40

Figure S4. <sup>1</sup>H NMR and <sup>13</sup>C NMR spectra of compound 6.

hamed-CO1113 #628 RT: 2.17 AV: 1 NL: 1.26E5  
: (0,0) + c EI Full ms [50.00-500.00]

**COMP 06**

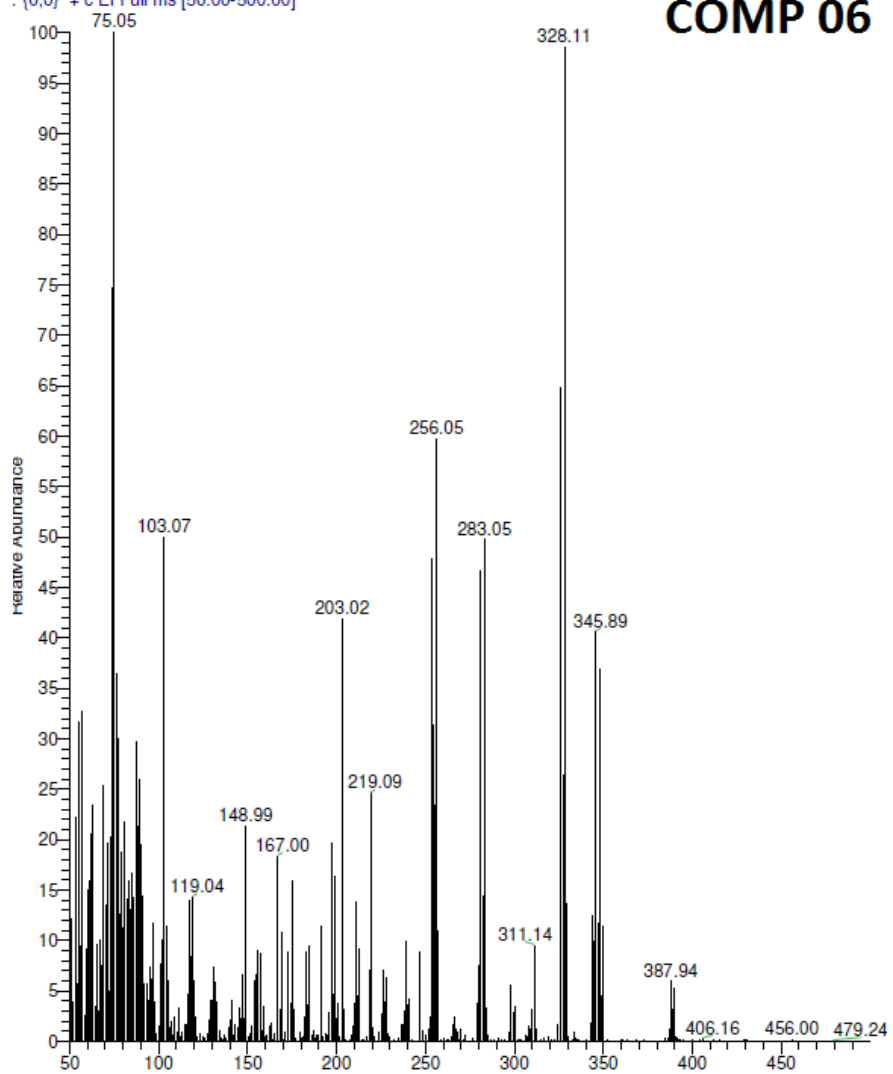

**Figure S4b.** Mass spectrum of compound 6.

# COMP 07

Ibrahim Mohey - COI -114 - Hnmr - T

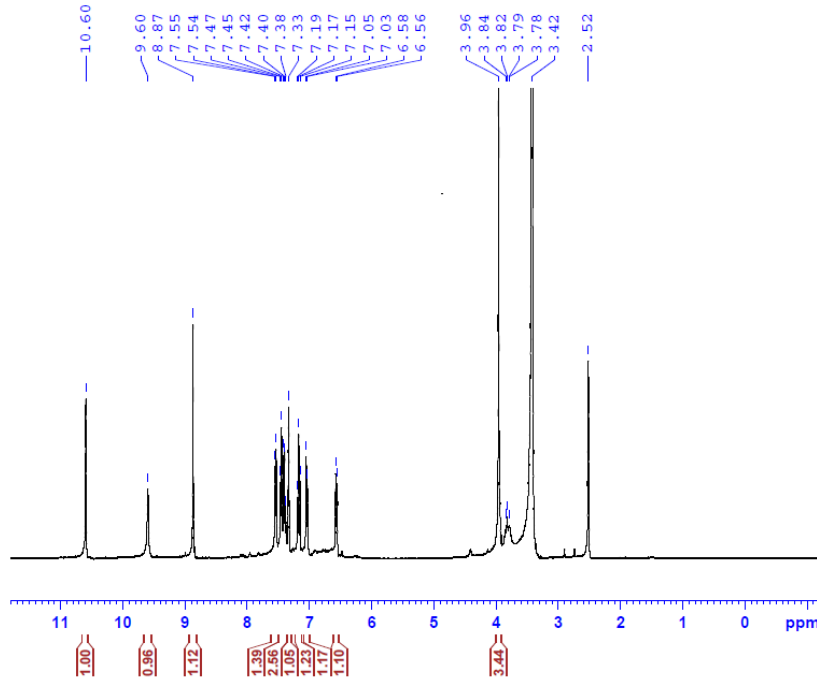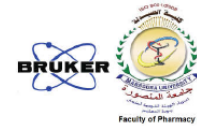

```

Current Data Parameters
NAME Ibrahim Mohey - COI -114 - Hnmr - T
EXPNO 1
PROCNO 1
F2 - Acquisition Parameters
Date_ 20220129
Time 13:03 h
INSTRUM spect
PROBHD Z108618 0945 (
PULPROG zgpg30
TD 65536
SOLVENT DMSO
NS 1
DS 4
SWH 8012.820 Hz
FIDRES 0.244652 Hz
AQ 4.089465 sec
RG 58.52
DM 62.400 usec
DE 6.00 usec
TE 293.2 K
D1 1.0000000 sec
D11 1.0000000 sec
SFO1 400.2024713 MHz
NUC1 13
P1 13.10 usec
PL1 13.0000000 W
F2 - Processing parameters
SI 65536
SF 400.2024713 MHz
WDW EM
SSB 0
LB 0.10 Hz
GB 0
PC 1.00
    
```

# COMP 07

Ibrahim Mohey - COI-114 - Hnmr - T

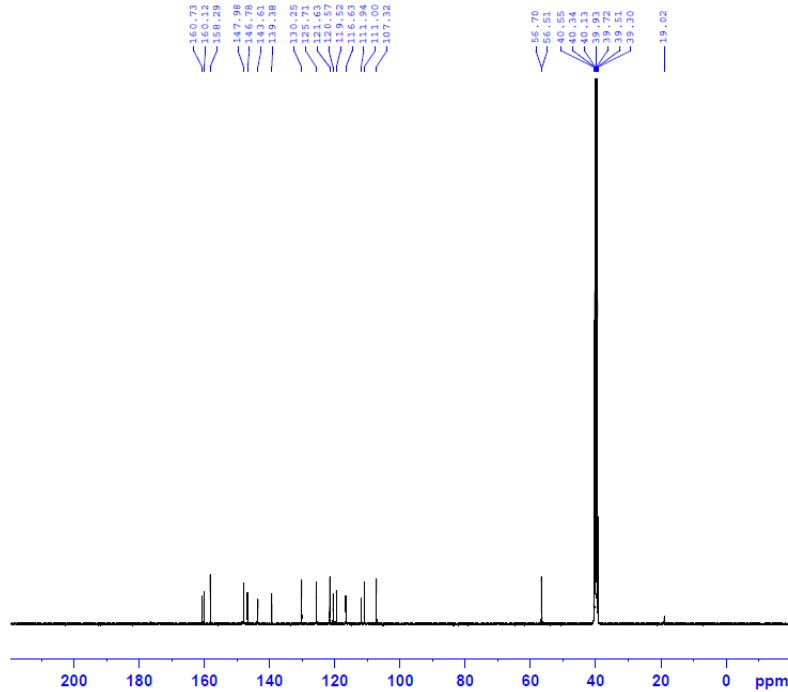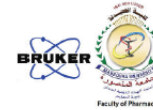

```

Current Data Parameters
NAME Ibrahim Mohey - COI-114 - Hnmr - T
EXPNO 20
PROCNO 1
F2 - Acquisition Parameters
Date_ 20220205
Time 1:52 h
INSTRUM spect
PROBHD Z108618 0945 (
PULPROG zgpg30
TD 65536
SOLVENT DMSO
NS 4
DS 4
SWH 24038.461 Hz
FIDRES 0.733596 Hz
AQ 1.3631488 sec
RG 197.77
DM 20.800 usec
DE 6.50 usec
TE 294.8 K
D1 2.0000000 sec
D11 0.0300000 sec
TD0 1
SFO1 100.6404311 MHz
NUC1 13C
P1 10.00 usec
PLM1 47.0000000 W
SFO2 400.2016008 MHz
NUC2 1H
CPDPRG2 waltz16
PCPD2 90.00 usec
PLM2 13.0000000 W
PLM12 0.29249999 W
PLM13 0.14713000 W
F2 - Processing parameters
SI 32768
SF 100.6303700 MHz
WDW EM
SSB 0
LB 1.00 Hz
GB 0
PC 1.40
    
```

Figure S5. <sup>1</sup>H NMR and <sup>13</sup>C NMR spectra of compound 7.

hamed-CO1114 #1019 H1: 3.50 AV: 1 NL: 4./3E5  
: [0.0] + c EI Full ms [50.00-500.00]

# COMP 07

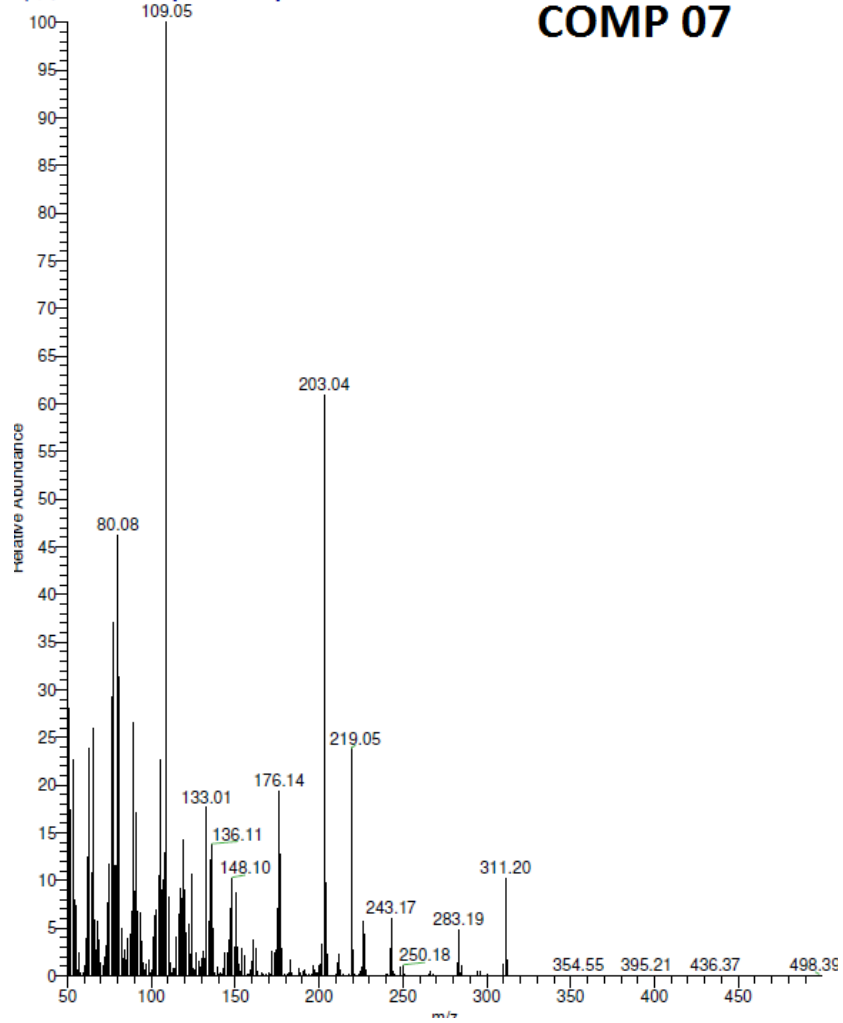

Figure S5. Mass spectrum of compound 7.

Ibrahim Mohey - COI -115 - Hnmr - T

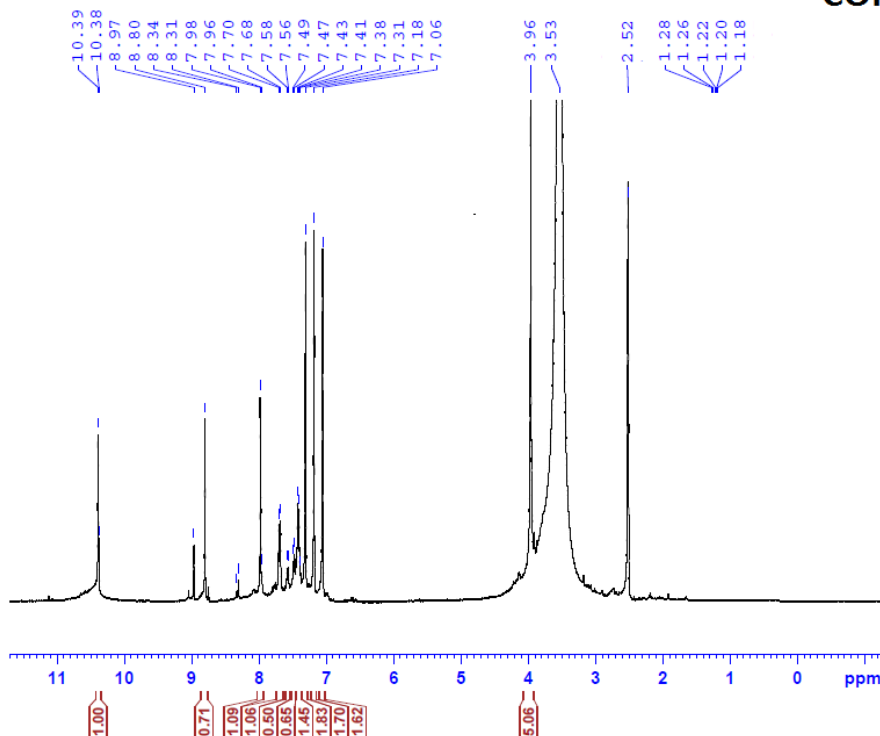

COMP 08

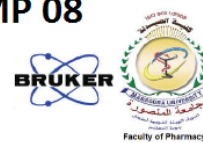

```

Current Data Parameters
NAME Ibrahim Mohey - COI -115 - Hnmr - T
EXPNO 10
PROCNO 1

F2 - Acquisition Parameters
Date_ 20220125
Time 12.07 h
INSTRUM spect
PROBHD Z108618_0945
PULPROG zgpg30
TD 65536
SOLVENT DMSO
NS 2
DS 4
SWH 8013.823 Hz
FIDRES 0.244532 Hz
AQ 4.089445 sec
RG 58.93
DE 62.450 usec
TE 295.0 K
D1 1.00000000 sec
D11 0.03000000 sec
TDO 0
SFO1 400.2024712 MHz
NUC1 13
F1 13.50 usec
F2 13.00000000 W

F2 - Processing parameters
SI 65536
SF 400.2024712 MHz
WDW EM
SSB 0
GB 0
PC 1.00
    
```

Ibrahim Mohey - COI-115 - Hnmr - T

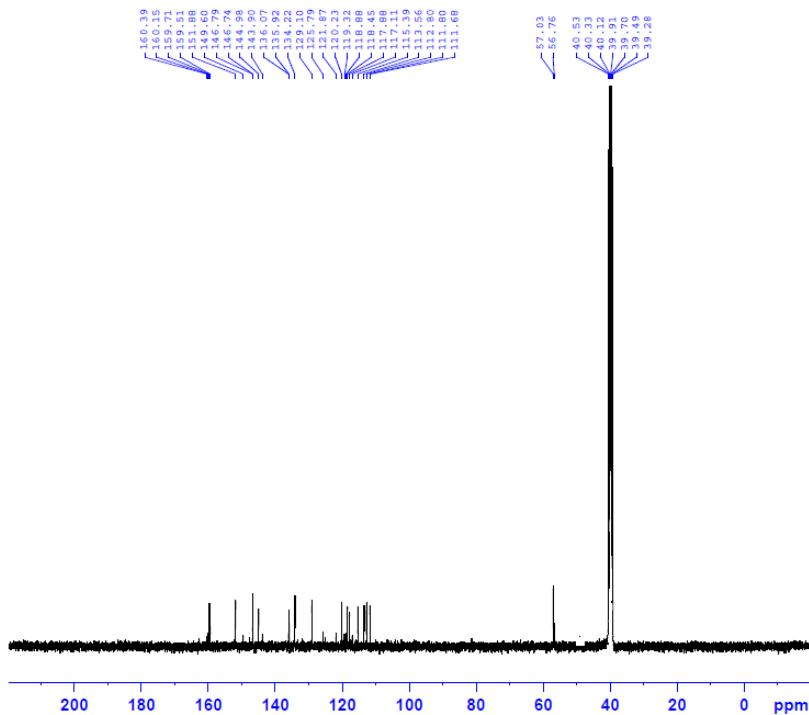

COMP 08

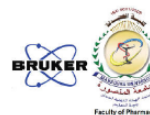

```

Current Data Parameters
NAME Ibrahim Mohey - COI-115 - Hnmr - T
EXPNO 10
PROCNO 1

F2 - Acquisition Parameters
Date_ 20220205
Time 4.01 h
INSTRUM spect
PROBHD Z108618_0945
PULPROG zgpg30
TD 65536
SOLVENT DMSO
NS 2
DS 4
SWH 24038.461 Hz
FIDRES 0.731596 Hz
AQ 1.3631488 sec
RG 197.77
DE 20.800 usec
TE 295.0 K
D1 2.00000000 sec
D11 0.03000000 sec
TDO 0
SFO1 100.6404331 MHz
NUC1 13
F1 10.00 usec
F2 47.00000000 W
SFO2 400.2016008 MHz
NUC2 1H
CPDPRG2 waltz16
PCPD2 90.00 usec
FLM2 13.00000000 W
FLM12 0.23249999 W
FLM13 0.14713000 W

F2 - Processing parameters
SI 32768
SF 100.6303700 MHz
WDW EM
SSB 0
GB 0
PC 1.40
    
```

Figure S6. <sup>1</sup>H NMR and <sup>13</sup>C NMR spectra of compound 8.

amed-COI115 #60 RT: 0.23 AV: 1 NL: 5.53E4  
{0,0} + c EI Full ms [50.00-500.00]

# COMP 08

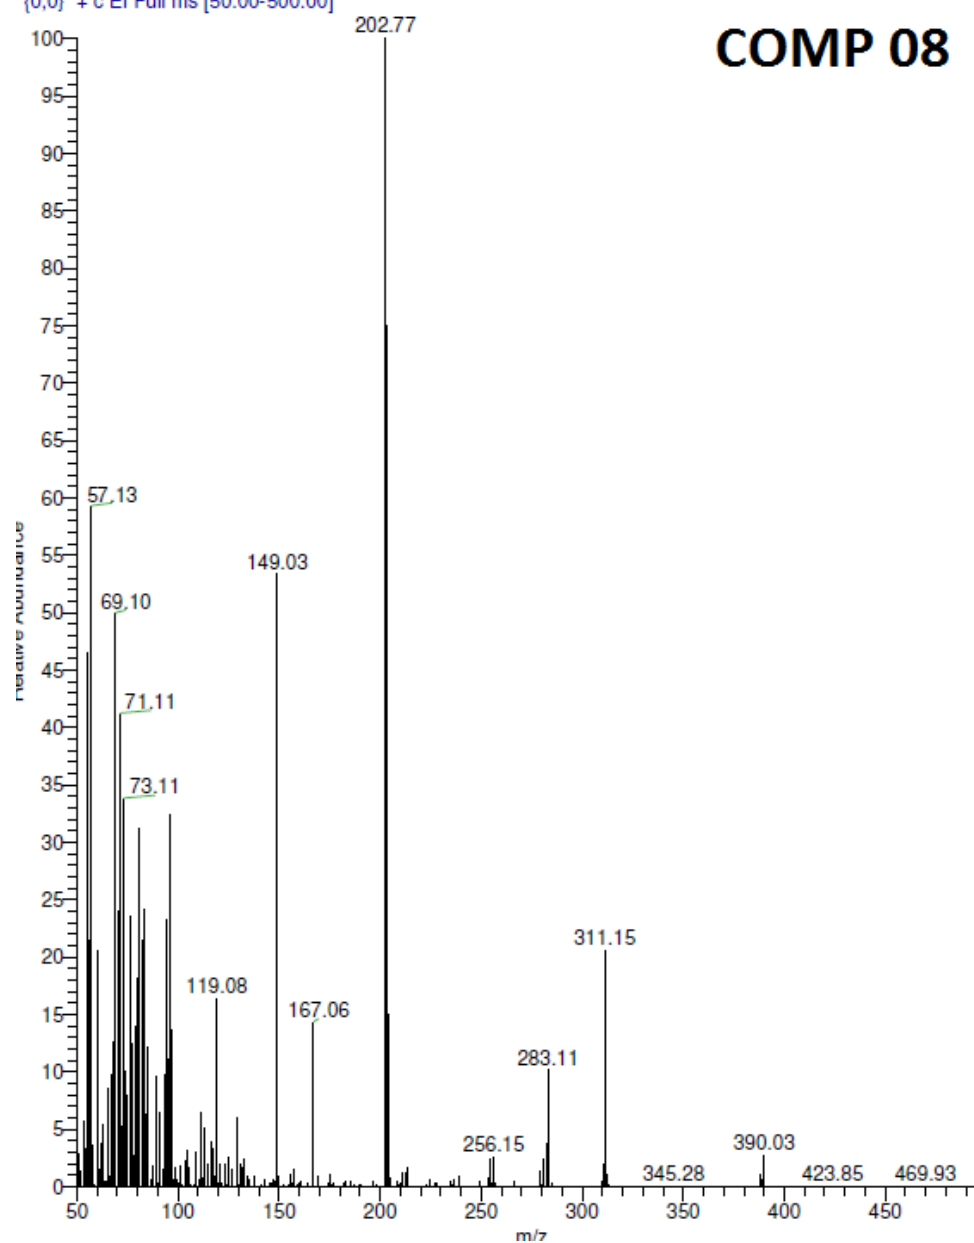

Figure S6b. Mass spectrum of compound 8.
